# Supplementary material for: Self-Compassion: A Potential Path to Adolescent Resilience and Positive Exploration
Source: Springer Nature journal article supplement (doi:10.1007/s10826-018-1125-1), 2018-06-15
Supplement: MOESM1 [file 15849054]

**SUPPLEMENTARY MATERIALS**

Table S11

*Age does not moderate the association between self-compassion and the brief resilience scale*

| Predictor | *b* | *b*  95% CI  [LL, UL] | *beta* | *beta*  95% CI  [LL, UL] | *sr2* | *sr2*  95% CI  [LL, UL] | *r* | Fit |
| --- | --- | --- | --- | --- | --- | --- | --- | --- |
| (Intercept) | 1.90* | [0.28, 3.53] |  |  |  |  |  |  |
| Father Ed | 0.04** | [0.01, 0.07] | 0.09 | [0.02, 0.15] | .01 | [-.00, .01] | .08* |  |
| Mother Ed | 0.03 | [-0.01, 0.06] | 0.05 | [-0.01, 0.12] | .00 | [-.00, .01] | .06* |  |
| Age | -0.05 | [-0.16, 0.06] | -0.13 | [-0.40, 0.15] | .00 | [-.00, .00] | -.04 |  |
| SCS | 0.24 | [-0.26, 0.75] | 0.22 | [-0.24, 0.67] | .00 | [-.00, .00] | .50** |  |
| SCS x Age | 0.02 | [-0.01, 0.06] | 0.32 | [-0.16, 0.81] | .00 | [-.00, .00] |  |  |
|  |  |  |  |  |  |  |  | *R2*  = .269** |
|  |  |  |  |  |  |  |  | 95% CI[.22,.31] |
|  |  |  |  |  |  |  |  |  |

*Note.* * indicates *p* < .05; ** indicates *p* < .01. A significant *b*-weight indicates the beta-weight and semi-partial correlation are also significant. *b* represents unstandardized regression weights; *beta* indicates the standardized regression weights; *sr2* represents the semi-partial correlation squared; *r* represents the zero-order correlation. *LL* and *UL* indicate the lower and upper limits of a confidence interval, respectively. SCS = Self-compassion scale, CEI = Curiosity and Exploration Inventory Full Scale, CEI-S = Curiosity and Exploration Inventory Stretching Subscale, CEI-E = Curiosity and Exploration Inventory Embracing Subscale, Gen = Gender, Father Ed = Father’s level of education, Mother Ed = Mother’s level of education.
